# Supplementary material for: Figure Interpretation Assessment Tool-Health (FIAT-health) 2.0: from a scoring instrument to a critical appraisal tool
Source: BMC Med Res Methodol. 2019 Jul 23;19:160. doi: 10.1186/s12874-019-0797-6 (PMC6647325; doi:10.1186/s12874-019-0797-6)
Supplement: Supplementary file 1 — FIAT-Health 1.0 in Excel format. (XLSX 64 kb) [file 12874_2019_797_MOESM1_ESM.xlsx]

## Sheet: Vragenlijst FIAT-Health
	Vraag	Antwoord	Uw notities	Toelichting
	Uw onderzoeksnummer:
				Toelichting termen in de FIAT-Health
	Welk cijfer wilt u beoordelen? (Geef de zinssnede waarin het cijfer wordt genoemd.)
	Vraag 1: Herkomst van het cijfer			Toelichting?
	1a. Is de publicatie waarin het cijfer is gerapporteerd een primaire publicatie?
				Toelichting?
				Toelichting?
				Toelichting?
				Toelichting?
				Toelichting?
				Toelichting?
				Toelichting?
				Toelichting?
				Toelichting?
				Toelichting?
				Toelichting?
				Toelichting?
	U heeft nog niet alle vragen beantwoord
	Einde FIAT-Health

## Sheet: Samenvattend overzicht
		Samenvattend overzicht van de antwoorden
		Cijfer:	0
		Indien u een een vraag met "nee" heeft beantwoord, klik op de betreffende cel om een aandachtspunt te weergeven.
		Karakterisering van het cijfer			Feitelijke vragen			Beoordeling van het cijfer
		Het cijfer is samengesteld			De primaire publicatie is bekend			Geloofwaardigheid van het cijfer
		De dataverzameling wordt periodiek herhaald			De primaire publicatie is verifieerbaar			Onafhankelijkheid van het cijfer
		De totstandkoming van het cijfer is gebaseerd op:			De periode waar het cijfer betrekking op heeft is bekend			Onderwerp waar het cijfer betrekking op heeft
		-			-			Populatie waar het cijfer betrekking op heeft
		-			-			Geografisch gebied waar het cijfer betrekking op heeft
		-			-			-
		-			-			-
		-			-			-
					-			-
		Overeenkomst weergave primaire publicatie en de publicatie waaruit u het cijfer wilt beoordelen			-			-
					-
					-			Indien u een beoordeling lager dan 3 of "kan niet worden beoordeeld" heeft toegekend, selecteer dan de onderstaande paarse cel. Wanneer u op het pijltje rechts klikt kunt u uit een dropdown-menu een onderwerp kiezen.
		Typering van het cijfer			-
		Onderwerp			-
		Populatie			-
		Geografisch gebied			-			Mogelijke aandachtspunten
		Tijd
		Uw notities:
		0
		0
		0

## Sheet: Schaalinvoer
Dichotimous	Scale	Ranking	Toelichting																										Mogelijke aandachtspunten
Ja	1	*	Toelichting 1a	Toelichting 2a		Toelichting 3a		Toelichting 4a		Toelichting 5a		Toelichting 6a		Toelichting 7a		Toelichting 8a		Toelichting 9a		Toelichting 10a		Toelichting 11a		Toelichting 12a		Toelichting 13a			Geloofwaardigheid 1/2							Zwaar meegewogen
Nee	2	**	Toelichting 1b	Toelichting 2b		Toelichting 3b		Toelichting 4b		Toelichting 5b		Toelichting 6b		Toelichting 7b		Toelichting 8b		Toelichting 9b		Toelichting 10b		Toelichting 11b		Toelichting 12b		Toelichting 13b			Geloofwaardigheid "kan niet worden beoordeeld"
	3	***	Toelichting 1c	Toelichting?		Toelichting?		Toelichting?		Toelichting?		Toelichting?		Toelichting?		Toelichting?		Toelichting 9c		Toelichting 10c		Toelichting 11c		Toelichting 12c		Toelichting 13c			Onafhankelijkheid 1/2
	4	****	Toelichting?															Toelichting 9d		Toelichting?		Toelichting 11d		Toelichting?		Toelichting?			Onafhankelijkheid "kan niet worden beoordeeld"
	Kan niet worden beoordeeld	*****	Voorbeelden															Toelichting 9e				Toelichting?							Onderwerp 1/2
																		Toelichting?											Onderwerp "kan niet worden beoordeeld"
																													Populatie 1/2
																													Populatie "kan niet worden beoordeeld"
																													Geografisch gebied 1/2
																													Geografisch gebied "kan niet worden beoordeeld"
																													Representativiteit steekproef 1/2
																													Representativiteit steekproef "kan niet worden beoordeeld"
																													Bruikbaarheid registratie 1/2
																													Bruikbaarheid registratie "kan niet worden beoordeeld"
																													Vragenlijst conclusie 1/2
																													Vragenlijst conclusie "kan niet worden beoordeeld"
																													Nauwkeurigheid observaties 1/2
																													Nauwkeurigheid observaties "kan niet worden beoordeeld"
																													Plausibiliteit model 1/2
																													Plausibiliteit model "kan niet worden beoordeeld"

## Sheet: Toelichting bij de vragen
	Vraag 1: Herkomst van het cijfer
1a.	U kunt een cijfer beoordelen uit een primaire publicatie of uit een publicatie die refereert aan een cijfer uit een primaire publicatie.
	Bijvoorbeeld: Een rapport van een onderzoeksinstituut is meestal een primaire publicatie.
1b.	In de publicatie waaruit u het cijfer wilt beoordelen (bijvoorbeeld een krantenartikel, een stuk op een website of een persbericht) is een cijfer gebruikt uit een primaire publicatie. De primaire publicatie is bekend als de publicatie waarin het cijfer is gerapporteerd daarnaar verwijst.
1c.	Verifieerbaarheid van de primaire publicatie betekent dat de primaire publicatie traceerbaar is en de mogelijkheid bestaat om de totstandkoming van het cijfer te controleren.
	Om de vragen van de FIAT-Health 1.0 verder te kunnen beantwoorden is toegang tot de primaire publicatie nodig. Daarmee is het mogelijk om de interpretatie van het cijfer dat u wilt beoordelen te vergelijken met de primaire publicatie. Indien de primaire publicatie niet verifieerbaar is, dan is het raadzaam deze alsnog te achterhalen.
	Bijvoorbeeld: In de publicatie waaruit u een cijfer wilt beoordelen staat dat het cijfer afkomstig is van een bepaald onderzoeksinstituut, maar geeft verder geen indicatie van waar de primaire publicatie gevonden kan worden, noch is de gebruiker in staat om de primaire publicatie zelf te identificeren. In dat geval is de primaire publicatie niet bekend of verifieerbaar.
	Bijvoorbeeld: In de publicatie waaruit u een cijfer wilt beoordelen is een bronvermelding gegeven maar het rapport is niet openbaar. In dat geval is de primaire publicatie wel bekend, maar niet verifieerbaar.
	Vraag 2: Geloofwaardigheid van het cijfer
2a.	De geloofwaardigheid van de primaire publicatie is een subjectieve inschatting. Deze inschatting kan o.a. worden beïnvloed door de soort primaire publicatie en de aard van de auteur van de primaire publicatie. Zo zullen de meeste mensen een wetenschappelijk artikel uit een peer-reviewed tijdschrift als geloofwaardiger inschatten dan een bericht van een onbekend blogger. Ook wanneer het cijfer afk…
	Bijvoorbeeld: Een wetenschappelijk artikel uit een peer-reviewed tijdschrift, een uitgebreid rapport van een onderzoeksinstituut, een uitleg van een cijfer op een webpagina.
2b.	De onafhankelijkheid van de auteur van de primaire publicatie ten opzichte van het cijfer is een subjectieve inschatting. Deze inschatting kan worden beïnvloed door de financiële afhankelijkheid en politieke belangen van de opdrachtgever en de auteur bij de publicatie van het cijfer.
	Bijvoorbeeld: Een academische instelling voert een onderzoek uit in opdracht van een collectebusfonds, of de opdrachtgever is zelf de auteur van de primaire publicatie.
	Vraag 3: Typering van het cijfer
	De typering van het cijfer heeft invloed op hoe het cijfer wordt geïnterpreteerd. Afhankelijk van hoe het cijfer is uitgedrukt, geeft de gebruiker een waarde aan het cijfer.
3a.	Een enkelvoudig cijfer bestaat uit één onderdeel, zoals een absoluut getal (23.125) of een gemiddelde (bijvoorbeeld een gemiddeld BMI 23,2). Bijvoorbeeld een enkelvoudig cijfer: 12.456 vrouwen met borstkanker.
	Bijvoorbeeld een enkelvoudig cijfer: 12.456 vrouwen met borstkanker.
3b.	Een samengesteld cijfer bestaat uit meerdere onderdelen, zoals een breuk (1 op de 7) of een percentage (17%). Bijvoorbeeld een samengesteld cijfer: 1 op de 10 vrouwen heeft borstkanker, of 10%.
	Bijvoorbeeld een samengesteld cijfer: 1 op de 10 vrouwen heeft borstkanker, of 10%.
	Vraag 4: Onderwerp van tellen en meten
4a.	Een duidelijke beschrijving van het onderwerp is nodig om te begrijpen wat onderdeel uitmaakt van het onderwerp. Bijvoorbeeld: roken = 1 sigaret per dag, overgewicht = 25-30 BMI, of wachttijd = tijd in dagen tussen diagnose en behandeling. Bijvoorbeeld: voor zorguitgaven worden vaste definities gebruikt: System of Health Accounts (SHA), Zorgrekeningen, of Budgettair Kader Zorg (BKZ).
	Bijvoorbeeld: roken = 1 sigaret per dag, overgewicht = 25-30 BMI, of wachttijd = tijd in dagen tussen diagnose en behandeling.
	Bijvoorbeeld: voor zorguitgaven worden vaste definities gebruikt: System of Health Accounts (SHA), Zorgrekeningen, of Budgettair Kader Zorg (BKZ).
4b.	De definitie van het onderwerp die gebruikt is in de primaire publicatie moet overeenkomen met de definitie die gebruikt is in de publicatie waaruit u het cijfer wilt beoordelen. Bijvoorbeeld: de primaire publicatie gebruikt als onderwerp “alcoholgebruik”, waar alle alcoholhoudende dranken onder vallen. Het nieuwsbericht waaruit u het cijfer wilt beoordelen gebruikt het cijfer in verband met het …
	Bijvoorbeeld: de primaire publicatie gebruikt als onderwerp “alcoholgebruik”, waar alle alcoholhoudende dranken onder vallen. Het nieuwsbericht waaruit u het cijfer wilt beoordelen gebruikt het cijfer in verband met het onderwerp “het drinken van bier”. In dat geval komen de definities niet overeen wat tot onjuiste conclusies leidt.
	Vraag 5: Populatie waar het cijfer betrekking op heeft
5a.	Een duidelijke beschrijving van de populatie is nodig om te begrijpen wanneer iets of iemand wel of niet als eenheid wordt meegeteld binnen de populatie. Voorbeelden van populatiekenmerken zijn: leeftijdsgroep, sekse, sociaal economische status en etniciteit. Voorbeelden van populatiekenmerken in het geval van zorginstellingen zijn: grootte van zorginstellingen, soort zorginstellingen en de speci…
	Bijvoorbeeld: de uitdrukking “vrouwen” is onduidelijk, de populatie kan worden gespecificeerd door beschrijvingen toe te voegen, bijvoorbeeld “volwassen vrouwen”, of “volwassen vrouwen tussen de 20 en 40 jaar na 3 maanden zwangerschap”.
5b.	De definitie van de populatie die gebruikt is in de primaire publicatie moet overeenkomen met de definitie die gebruikt is in de publicatie waaruit u het cijfer wilt beoordelen. Bijvoorbeeld: in de primaire publicatie is de populatie gedefinieerd als “volwassen vrouwen tussen de 20 en 40 jaar, na 3 maanden zwangerschap”. In de publicatie waaruit u het cijfer wilt beoordelen is de definitie aanged…
	Bijvoorbeeld: in de primaire publicatie is de populatie gedefinieerd als “volwassen vrouwen tussen de 20 en 40 jaar, na 3 maanden zwangerschap”. In de publicatie waaruit u het cijfer wilt beoordelen is de definitie aangeduid als “zwangere vrouwen”. In dat geval is de populatie te ruim omschreven in de publicatie waaruit u het cijfer wilt beoordelen, en komt de populatie niet overeen.
	Vraag 6: Geografisch gebied waar het cijfer betrekking op heeft
6a.	Het geografisch gebied moet bekend zijn om de generaliseerbaarheid van het cijfer te kunnen inschatten. Bijvoorbeeld: Amsterdam Zuidoost, of de provincie Limburg.
	Bijvoorbeeld: Amsterdam Zuidoost, of de provincie Limburg.
6b.	Het geografisch gebied dat gebruikt is in de primaire publicatie moet overeenkomen met het geografisch gebied dat gebruikt is in de publicatie waaruit u het cijfer wilt beoordelen of het moet plausibel zijn dat het daarnaar te generaliseren is. Bijvoorbeeld: Het cijfer in de primaire publicatie heeft betrekking op “de gemeente Amsterdam”. De publicatie waaruit u het cijfer wilt beoordelen rapport…
	Bijvoorbeeld: Het cijfer in de primaire publicatie heeft betrekking op “de gemeente Amsterdam”. De publicatie waaruit u het cijfer wilt beoordelen rapporteert het geografisch gebied als “Nederland”. In dat geval komt het geografisch gebied niet overeen.
	Vraag 7: Periode waar het cijfer betrekking op heeft
7a	De periode waar het cijfer betrekking op heeft moet bekend zijn om de relevantie van het cijfer te kunnen beoordelen. De periode waar het cijfer betrekking op heeft is de periode waarbinnen de eenheden zijn geteld. Zoals op een bepaald punt in de tijd of binnen een bepaald jaar. Bijvoorbeeld: De primaire publicatie rapporteert een jaarprevalentie gebaseerd op een telling binnen het jaar 2011.
	Bijvoorbeeld: De primaire publicatie rapporteert een jaarprevalentie gebaseerd op een telling binnen het jaar 2011.
7b.	Het doel van deze vraag is om na te gaan of de periode waarin is gemeten overeenkomt met de periode waarover u iets wilt weten, of dat het aannemelijk is dat het verschil tussen de twee klein genoeg is. In veel gevallen wordt in een secundaire publicatie de periode niet expliciet vermeld, maar blijkt uit de tekst dat de veronderstelling dat het cijfer actueel is, en dus betrekking heeft op het he…
	Bijvoorbeeld: De primaire publicatie rapporteert een cijfer gebaseerd op gegevens van drie jaar geleden. Zijn deze cijfers nog actueel genoeg om iets over het heden te zeggen?
	Vraag 8 t\m13: Methoden van tellen en meten
	Vraag 8: Periodiek herhaalde of eenmalige dataverzameling
	Wanneer u een beslissing maakt over het gebruik van een cijfer kan het interessant zijn te weten of de dataverzameling periodiek herhaald wordt of zelfs continue plaatsvindt of dat deze eenmalig heeft plaatsgevonden. Wanneer het cijfer afkomstig is uit een periodiek herhaalde dataverzameling, is het mogelijk deze te vergelijken met voorgaande data, of het cijfer te vernieuwen wanneer er nieuwe da…
8a.	De dataverzameling wordt periodiek herhaald met dezelfde methoden. Bijvoorbeeld: een jaarlijks herhaalde enquête, of routinematig verzamelde registratiedata.
	Bijvoorbeeld: een jaarlijks herhaalde enquête, of routinematig verzamelde registratiedata.
8b.	De dataverzameling is eenmalig wanneer de dataverzameling slechts een keer is uitgevoerd. Bijvoorbeeld: een eenmalig wetenschappelijk onderzoek.
	Bijvoorbeeld: een eenmalig wetenschappelijk onderzoek.
	Vraag 9: Een steekproef
9a.	Bij een steekproef is een selectie van de gehele populatie onderzocht. Bij een steekproef moet rekening gehouden zijn met de omvang en de representativiteit.
9b.	De omvang van de steekproef kan iets zeggen over de statistische betrouwbaarheid. Bijvoorbeeld: n=150.
	Bijvoorbeeld: n=150.
9c.	Voor respons geldt: hoe hoger, hoe beter. Bij een lage respons is het nuttig om te bedenken of er mogelijk (zelf)selectie kan zijn opgetreden en dat dus de non-respondenten op relevante kenmerken afwijken van de respondenten. Bijvoorbeeld: De respons betreft 35% van de benaderde patiënten.
	Bijvoorbeeld: De respons betreft 35% van de benaderde patiënten.
9d.	Als er voor de berekening van het cijfer belangrijke groepen buiten beschouwing zijn gelaten, hebben er exclusies plaatsgevonden. Het kan nuttig zijn om na te gaan op welke gronden deze exclusies plaatsvonden en of dit gevolgen kan hebben voor de interpretatie van het cijfer of de statistische betrouwbaarheid (omdat de feitelijke n kleiner wordt). Bijvoorbeeld: Voor de berekening van het cijfer z…
	Bijvoorbeeld: Voor de berekening van het cijfer zijn patiënten met co-morbiditeit uitgesloten, dit betrof 20% van de respondenten.
9e.	Een steekproef is representatief als de steekproef dezelfde eigenschappen heeft als de populatie. Let daarbij onder andere op de verdeling van leeftijd, sekse, etniciteit, sociaal economische status, en geografisch gebied. Indien de steekproef representatief is, kan de data gegeneraliseerd worden naar de gehele populatie. Bijvoorbeeld: Het cijfer gaat over immigranten, maar in het onderzoek zijn …
	Bijvoorbeeld: Het cijfer gaat over immigranten, maar in het onderzoek zijn alleen mensen in het Nederlands benaderd. Daardoor worden immigranten die het Nederlands niet goed beheersen uitgesloten, met het gevolg dat de steekproef geen goede dwarsdoorsnede van de populatie is.
	Vraag 10: Een Registratie
10a.	Bij een bestaande registratie worden gegevens over een populatie vastgelegd en opgeslagen.
10b.	De soort registratie beïnvloedt welk onderdeel van de populatie geregistreerd wordt. Bijvoorbeeld: het cijfer is afkomstig van een huisartsenregistratie.
	Bijvoorbeeld: het cijfer is afkomstig van een huisartsenregistratie.
10c.	De bruikbaarheid van de registratie als basis voor het cijfer is afhankelijk van tal van factoren, zoals o.a. de veronderstelde volledigheid, de kans dat er registratiefouten optreden en het doel van de registratie, het systeem van coderen (en kans op fouten), wie de data registreert en de mate van standaardisatie.
	Vraag 11: Vragenlijstonderzoek
11a.	Bij vragenlijstonderzoek is het onderwerp gemeten door middel van de vragen die aan deelnemers worden gesteld. Daarbij zijn keuzes gemaakt over welke vragen zijn gesteld en de manier waarop de respondenten antwoord kunnen geven.
11b.	Als de precieze vraag die aan respondenten is voorgelegd bekend is, helpt dit om in te schatten of de conclusie die hierop gebaseerd is, gerechtvaardigd is. Bijvoorbeeld: het cijfer is gebaseerd op de vraag: “Hoe vaak voelde u zich somber dit jaar?”. De formulering van een vraag kan sturend zijn: “vindt u het ook zo belangrijk om voldoende te bewegen?”
	Bijvoorbeeld: het cijfer is gebaseerd op de vraag: “Hoe vaak voelde u zich somber dit jaar?”. De formulering van een vraag kan sturend zijn: “vindt u het ook zo belangrijk om voldoende te bewegen?”
11c.	Als de antwoordcategorieën van de vragen die gesteld zijn, bekend zijn, helpt dit om in te schatten of de conclusie die hierop gebaseerd is, gerechtvaardigd is. Bijvoorbeeld: De antwoordcategorieën zijn vaak, weleens, soms, en nooit.
	Bijvoorbeeld: De antwoordcategorieën zijn vaak, weleens, soms, en nooit.
11d.	De formulering van de antwoordcategorieën kan soms sturend zijn of antwoordcategorieën kunnen niet uitputtend zijn. Bijvoorbeeld: “altijd, vaak, af en toe”.
	Bijvoorbeeld: “altijd, vaak, af en toe”
	Vraag 12: Directe observaties
12a.	Bij directe observaties zijn de eenheden geteld of gemeten door middel van waarnemingen.
12b.	De manier waarop de directe observatie heeft plaatsgevonden moet bekend zijn om de nauwkeurigheid van de directe observatie in te kunnen schatten.
12c.	De nauwkeurigheid van de directe observatie is afhankelijk van wie de observatie heeft uitgevoerd, en hoe deze observatie heeft plaatsgevonden. Bijvoorbeeld: om het gemiddelde overgewicht van kinderen te bepalen wordt het BMI berekend. Daarbij worden lengte en gewicht gemeten door medewerkers van de GGD.
	Bijvoorbeeld: om het gemiddelde overgewicht van kinderen te bepalen wordt het BMI berekend. Daarbij worden lengte en gewicht gemeten door medewerkers van de GGD.
	Vraag 13: Modelleren
13a.	Sommige onderwerpen kunnen niet of moeilijk worden gemeten, bijvoorbeeld omdat ze betrekking hebben op een hypothetische situatie of op de toekomst. Dan is het mogelijk om via modelleren tot een cijfer te komen. Modellen kunnen betrekking hebben op ‘wat als scenario’s’. Bijvoorbeeld: hoeveel zouden we besparen als niemand meer alcohol drinkt? Of op verwachtingen voor de toekomst. Of: hoe gaan bep…
	Modellen kunnen betrekking hebben op ‘wat als scenario’s’. Bijvoorbeeld: hoeveel zouden we besparen als niemand meer alcohol drinkt? Of op verwachtingen voor de toekomst. Of: hoe gaan bepaalde prevalenties zich in de toekomst ontwikkelen?
13b	In een model zijn verschillende aannames gemaakt, deze aannames moeten bekend zijn om het model op waarde te kunnen schatten. De aannames in het model moeten zorgvuldig gemaakt zijn door de auteur van de primaire publicatie, en zijn onderbouwd. Bijvoorbeeld: de kosten van roken voor de maatschappij zijn niet meetbaar, daarom zijn deze kosten gemodelleerd. De onderdelen van het model, en de gebrui…
	Bijvoorbeeld: de kosten van roken voor de maatschappij zijn niet meetbaar, daarom zijn deze kosten gemodelleerd. De onderdelen van het model, en de gebruikte cijfers, zijn beschreven in de primaire publicatie.
13c.	De aannames in het model moeten zorgvuldig gemaakt zijn door de auteur van de primaire publicatie, en zijn onderbouwd.
	Het inschatten van de plausibiliteit van de aannames die aan modellen ten grondslag liggen, vergt in veel gevallen veel achtergrondkennis bijvoorbeeld van wetenschappelijk literatuur. Hier zal dus vaak een inhoudelijk expert voor nodig zijn.
	14 en 15: Eindoordeel
	Na het ontvangen van het overzicht van uw antwoorden op de FIAT-Health 1.0, geeft u een beoordeling aan het cijfer.
14.	Hier geeft u uw oordeel over de correctheid van het cijfer.
15.	Hier geeft u uw oordeel over het gebruik van het cijfer in de rapportage waaruit u het cijfer beoordeelt. Bedenk daarbij in hoeverre de interpretatie die in de rapportering is gebruikt past bij de het cijfer uit de primaire publicatie.

## Sheet: Aandachtspunten
		Vraag 1: Herkomst van het cijfer
1a.		Geen consequenties.
1b.	Indien nee:	De primaire publicatie is niet bekend. De primaire publicatie moet bekend zijn, om de juistheid van het cijfer te kunnen beoordelen. Het is raadzaam stappen te nemen om de primaire publicatie van het cijfer te identificeren.
1c.	Indien nee:	De primaire publicatie is niet verifieerbaar. De primaire publicatie moet verifieerbaar zijn om het cijfer te kunnen beoordelen. Het is raadzaam stappen te nemen om inzicht te krijgen in de primaire publicatie van het cijfer.
		Vraag 2: Geloofwaardigheid van het cijfer
2a.	Indien schaal 1/2:	U beoordeelt de geloofwaardigheid van de auteur negatief. Wanneer de geloofwaardigheid van de auteur van de publicatie laag is, is de kans groter dat er bias is opgetreden bij de totstandkoming van het cijfer. Het is raadzaam de totstandkoming van het cijfer zorgvuldig te controleren.
	Indien schaal “kan niet worden beoordeeld”:	U geeft aan dat u de geloofwaardigheid van de auteur niet kunt beoordelen. Voor de juiste interpretatie van het cijfer is het raadzaam te overwegen wat de reputatie van de auteur van de primaire publicatie is, en wat de publicatiesoort van de primaire publicatie is, bijvoorbeeld een wetenschappelijk artikel, of een post op een webpagina.
2b.	Indien schaal 1/2:	U beoordeelt de onafhankelijkheid van de auteur ten overstaande het cijfer negatief. Wanneer de auteur van de primaire publicatie afhankelijk is van dit specifieke cijfer, dan kunnen de belangen die spelen rondom het cijfer invloed hebben op de totstandkoming van het cijfer. Bedenk welk effect de belangen die spelen bij dit cijfer zouden kunnen hebben op de hoogte van het cijfer.
	Indien schaal “kan niet worden beoordeeld”:	U geeft aan dat u de onafhankelijkheid van de auteur niet kunt beoordelen. Bedenk welke belangen spelen bij de publicatie van het cijfer, en of de opdrachtgever van het onderzoek mogelijk invloed zou kunnen hebben bij een hoog of laag cijfer. Houd rekening met de instelling die het onderzoek heeft uitgevoerd, en of deze onafhankelijk van de opdrachtgever onderzoek kan doen, en zelf geen belang he…
		Vraag 3: Typering van het cijfer
3a.	Indien ja:	Het cijfer is enkelvoudig. Bij een enkelvoudig cijfer is de context waarbinnen het cijfer valt mogelijk niet duidelijk. Bedenk hoe het cijfer zou zijn uitgedrukt als samengesteld cijfer, en of daardoor de interpretatie van het cijfer verandert.
3b.	Indien ja:	Het cijfer is samengesteld: Bij een samengesteld cijfer is het mogelijk niet duidelijk wat het cijfer is als het als absoluut cijfer wordt, waardoor het cijfer groter of kleiner lijkt dan het is. Bedenk wat het absolute cijfer zou zijn, en of daardoor de interpretatie van het cijfer verandert.
3c.	Indien nee:	Het cijfer dat u wilt beoordelen en het cijfer in de primaire publicatie komen niet overeen. Bedenk wat de gevolgen zijn van de verandering van het cijfer.
		Vraag 4. Onderwerp van tellen en meten
4a.	Indien schaal 1/2:	U beoordeelt de duidelijkheid waarmee het onderwerp is beschreven in de primaire publicatie negatief. Bedenk welke informatie over het onderwerp ontbreekt.
	Indien schaal “kan niet worden beoordeeld”	U geeft aan dat u de duidelijkheid waarmee het onderwerp is beschreven niet kunt beoordelen. Bedenk welke kennis u nodig heeft om een beoordeling te kunnen geven over de duidelijkheid waarmee het onderwerp is beschreven.
4b.	Indien nee:	U geeft aan dat de beschrijving van het onderwerp in de publicatie waaruit het cijfer wilt beoordelen niet overeenkomt met de beschrijving in de primaire publicatie. Bedenk welke gevolgen de verandering in het onderwerp zou kunnen hebben op het cijfer.
		Vraag 5: Populatie waarover geteld en gemeten wordt
5a.	Indien schaal 1/2:	U beoordeelt de duidelijkheid waarmee de populatie is beschreven inde primaire publicatie negatief. Bedenk welke informatie over de populatie ontbreekt.
	Indien schaal “kan niet worden beoordeeld”	U geeft aan dat u de duidelijkheid waarmee populatie is beschreven niet kunt beoordelen. Bedenk welke kennis over de populatie u nodig heeft om een beoordeling te kunnen geven over de duidelijkheid waarmee de populatie is beschreven.
5b.	Indien nee:	U geeft aan dat de beschrijving van de populatie in de publicatie waar u het cijfer uit wilt beoordelen niet overeenkomt met de beschrijving in de primaire publicatie. Bedenk of dit zou kunnen leiden tot een onder- of overschatting van het cijfer.	Aanpassing: Bedenk of deze verandering in populatie zou = dit
		Vraag 6: Geografisch gebied waar het cijfer betrekking op heeft
6a.	Indien schaal 1/2:	U beoordeelt de duidelijkheid waarmee het geografisch gebied is beschreven in de primaire publicatie negatief. Bedenk welke informatie over het geografisch gebied ontbreekt.
	Indien schaal “kan niet worden beoordeeld”	U geeft aan dat u de duidelijkheid waarmee het geografisch gebied is beschreven niet kunt beoordelen. Bedenk welke kennis u nodig heeft om een beoordeling te kunnen geven over de duidelijkheid waarmee het geografisch gebied is omschreven.
6b.	Indien nee:	U geeft aan dat het geografisch gebied in de publicatie waaruit u het cijfer wilt beoordelen niet overeenkomt met de primaire publicatie. Bedenk wat de gevolgen zijn voor het cijfer, houd daarbij rekening met de samenstelling van de populatie.	weggelaten: de beschrijving in en - door de verandering in het geografisch gebied -
		Vraag 7: Periode waar het cijfer betrekking op heeft
7a.	Indien nee:	U geeft aan dat de periode waar het cijfer betrekking op heeft niet is beschreven in de primaire publicatie. Het is raadzaam te achterhalen in welke periode de eenheden zijn geteld.
	Indien ja:	De periode waar het cijfer betrekking op heeft is beschreven. Bedenk wat de invloed is van de periode waarin is geteld op het cijfer. Is het cijfer wellicht verouderd?
7b.	Indien nee:	U geeft aan dat de periode beschreven in de publicatie waaruit u het cijfer wilt beoordelen niet overeenkomt met de periode beschreven in de primaire publicatie. Is het cijfer nog relevant in de publicatie waaruit u het cijfer wilt beoordelen?	Weggelaten: Bedenk welke gevolgen de verandering van de periode zou kunnen hebben op het cijfer.
		Vraag 8 t/m 13: Methode van tellen en meten
		Vraag 8. Periodiek herhaalde of eenmalige dataverzameling
8a.	Indien ja:	U geeft aan dat de dataverzameling periodiek wordt herhaald. Bedenk welke voor- en nadelen er zijn van een periodiek herhaalde dataverzameling voor de berekening van dit specifieke cijfer.
8b.	Indien ja:	U geeft aan dat de dataverzameling eenmalig is. Bedenk welke voor- en nadelen er zijn van een eenmalige dataverzameling voor de berekening van dit specifieke cijfer.
		Vraag 9: Steekproef
9a.	Indien ja:	Steekproef
9b.	Indien nee:	U geeft aan dat de grootte van de steekproef niet genoemd is. Kennis van de grootte van de steekproef is nodig om een inschatting te maken van de zekerheid van het cijfer, daarom is het raadzaam de grootte van de steekproef te achterhalen.
9c.	Indien nee:	Kennis van de grootte van de respons is nodig om in te kunnen schatten of er bias heeft plaatsgevonden tijdens de selectie van de steekproef, het is raadzaam de grootte van de beantwoording van de steekproef te achterhalen.	weggelaten: daarom is het, U geeft aan dat de grootte van de respons niet wordt genoemd
9d.	Indien nee:	Wanneer groepen zijn geëxcludeerd is de hoeveelheid data waarop het cijfer is gebaseerd verkleind, of is het mogelijk dat het cijfer niet langer representatief is voor de betreffende populatie.	weggelaten: Bedenk hoe de uitsluiting van de groep de zekerheid en representativiteit van het cijfer beïnvloedt. - U geeft aan dat er voor de berekening van het cijfer belangrijke groepen buiten beschouwing zijn gelaten.
9e.	Indien schaal 1/2:	U beoordeelt de representativiteit van de steekproef negatief. Bij een niet representatieve steekproef is het cijfer mogelijk niet van toepassing op de gehele populatie. Houd bij het interpreteren van het cijfer rekening met de beperkte representativiteit van het cijfer.
	Indien schaal “kan niet worden beoordeeld”	U geeft aan dat u de representativiteit van het cijfer niet kunt beoordelen. Inzicht in de representatie van de steekproef is nodig om te beoordelen of het cijfer van toepassing is op de gehele populatie. Het is raadzaam de kenmerken van de steekproef op te zoeken, en deze te vergelijken met de kenmerken van de populatie.
		Vraag 10: Registratie
10a.	Indien ja:	Registratie
10b.	Indien nee:	Kennis van de registratie is nodig om inzicht te krijgen in de kwaliteit van de data. De registratie geeft ook inzicht in welke populatie is geteld. Het is het raadzaam te achterhalen welk soort registratie is gebruikt om het cijfer mee te berekenen.	weggelaten: Het is niet bekend welke registratie is gebruikt om het cijfer uit te berekenen.
10c.	Indien schaal 1/2	U beoordeelt de bruikbaarheid van de registratie voor de berekening van dit cijfer negatief. Bedenk welke invloed het gebruik van deze registratie heeft op het cijfer.
	Indien schaal “kan niet worden beoordeeld”:	U geeft aan dat u de bruikbaarheid van de registratie als basis voor de berekening van dit cijfer niet kunt beoordelen. Het is raadzaam op te zoeken in welke periode, door wie, en hoe de data zijn geregistreerd om een beoordeling te kunnen geven over de bruikbaarheid van de registratie voor de berekening van dit cijfer.
		Vraag 11: Vragenlijstonderzoek
11a.	Indien ja:	Vragenlijstonderzoek
11b.	Indien nee:	U geeft aan dat de vragen uit het onderzoek niet genoemd zijn. Inzicht in de gestelde vragen is nodig een inschatting te maken of de vragen geschikt zijn om tot het cijfer te komen. Het is raadzaam de vragen waar het cijfer op gebaseerd is te achterhalen.
11c.	Indien nee:	Inzicht in de gestelde vragen en antwoordmogelijkheden is nodig om een inschatting te kunnen maken of de vragen en antwoorden geschikt zijn. Het is raadzaam de antwoordmogelijkheden waar het cijfer op gebaseerd is te achterhalen.	weggelaten: U geeft aan dat de antwoordmogelijkheden op de vragen uit het onderzoek niet genoemd zijn. Antwoordmogelijkheden - antwoorden. om tot het cijfer te komen.
11d.	Indien schaal 1/2:	U beoordeelt de conclusies die getrokken zijn op basis van de antwoorden negatief. Bedenk wat de gevolgen zijn van de interpretatie van de antwoorden op het cijfer.
	Indien schaal “kan niet worden beoordeeld”:	U geeft aan dat u de interpretatie van de antwoorden uit het vragenlijstonderzoek niet kunt beoordelen. Bedenk hoe de antwoorden in de vragenlijst zijn gebruikt om tot het cijfer te komen.
		Vraag 12: Directe observatie
12a.	Indien ja:	Directe observatie
12b.	Indien nee:	Inzicht in hoe de observatie heeft plaatsgevonden is belangrijk om de nauwkeurigheid van de observaties te kunnen beoordelen. Het is raadzaam te achterhalen hoe de directe observaties hebben plaatsgevonden.	weggelaten: U geeft aan dat het niet bekend is hoe de directe observatie heeft plaatsgevonden.
12c.	Indien schaal 1/2:	U beoordeelt de nauwkeurigheid van de directe observatie negatief. Bedenk welke gevolgen een onnauwkeurige observatie kan hebben op het cijfer.
	Indien schaal “kan niet worden beoordeeld”:	U geeft aan dat u de nauwkeurigheid van de directe observaties niet kunt beoordelen. De manier waarop de directe observatie is uitgevoerd beïnvloedt de betrouwbaarheid van het cijfer. Het is raadzaam de methoden waarmee de observatie is uitgevoerd zorgvuldig na te kijken, en daarbij te bedenken of er bij de observaties ruimte was voor het maken van fouten.
		Vraag 13: Modelleren
13a.	Indien ja:	Modelleren
13b.	Indien nee:	U geeft aan dat de aannames van het model niet beschreven zijn. Inzicht in de aannames van het model zijn nodig om de plausibiliteit van het model te kunnen inschatten. Het is raadzaam de aannames van het model te achterhalen.
13c.	Indien schaal 1/2:	U geeft aan dat de plausibiliteit van de aannames in het model laag is. Bedenk hoe de aannames in het model het cijfer hebben beïnvloed.
	Indien schaal “kan niet worden beoordeeld”:	U geeft aan dat u de plausibiliteit van de aannames in het model niet kunt beoordelen. Het is raadzaam om de aannames in het model na te kijken en daarbij te bedenken hoe de aannames van invloed zijn geweest op het cijfer.

## Sheet: Voorbereiding Data
Vraag	Antwoord	Code
1a.
1b.
1c.
2a.
2b.
3a.
3b.
3c.
4a.
4b.
5a.
5b.
6a.
6b.
7a
7b.
8a.
8b.
9a.
9b.
9c.
9d.
9e.
10a.
10b.
10c.
11a.
11b.
11c.
11d.
12a.
12b.
12c.
13a.
13b.
13c.
14
15

## Sheet: Evaluatie
	Evaluatie FIAT-Health 1.0
	Omdat wij op dit moment bezig zijn met een pilot studie, vernemen wij graag wat uw ervaringen zijn met het gebruik van de FIAT-Health 1.0. Daarom vragen wij u de volgende vragen te beantwoorden. Uw antwoorden zullen vertrouwelijk worden behandeld.
	Vragen:
	1. Hoe ervaart u het gebruik van de FIAT-Health 1.0?
	2. Welke overwegingen hebben het zwaarst meegewogen bij uw eindoordeel over de correctheid van het cijfer?
	3. Welke overwegingen hebben het zwaarst meegewogen bij uw eindoordeel van de juistheid van de rapportering van het cijfer?
	4. Heeft u problemen ervaren bij het invullen van de vragen?
	5. Zijn er belangrijke overwegingen niet geadresseerd in de FIAT-Health 1.0?
	6. Heeft u suggesties voor de verbetering van de FIAT-Health 1.0?

## Sheet: Glossery
Cijfer	Het gerapporteerde resultaat van het proces van tellen en meten.
Primaire publicatie	Het medium (bijv. rapport, database, website of wetenschappelijke publicatie) waar het cijfer voor het eerst openbaar werd gemaakt.
Auteur van de primaire publicatie	De persoon/personen of organisatie die het cijfer heeft beschreven in de primaire publicatie.
Gebruiker	De persoon of de instantie die het cijfer wil begrijpen, citeren, of verspreiden.
Onderwerp	Een aspect van de gezondheid of zorg waar het cijfer iets over zegt, bijvoorbeeld een ziekte, leefstijlfactor, of behandeling.
Populatie	Een verzameling van eenheden, die kan bestaan uit mensen of objecten.
Eenheid	Dat waarin het cijfer is uitgedrukt, bijvoorbeeld mensen, euro’s, dagen, kilometers, etc.
Proces van tellen	De manier waarop een hoeveelheid wordt bepaald. Bijvoorbeeld door middel van een registratie of directe observaties.
Proces van meten	De manier waarop de aanwezigheid of omvang wordt bepaald door middel van vastgestelde waarden. Bijvoorbeeld het meten van gewicht aan de hand van een weegschaal of aan de hand van een enquêtevraag.
Toelichting termen in de FIAT-Health
